# Supplementary material for: Tissue‐resident mucosal‐associated invariant T (MAIT) cells in the human kidney represent a functionally distinct subset
Source: PubMed Central journal article supplement (PMC7689767; doi:10.1002/eji.202048644), 2020-08-06
Supplement: EJI-50-1783-s001.pdf [file EJI-50-1783-s001.pdf]

## **Table of Content Supplemental Material**

Supplemental Table 1. Monoclonal antibodies used for phenotyping.

Supplemental Table 2. Monoclonal antibodies used for stimulation assay.

Supplemental Figure 1. Gating strategy for phenotypical analysis of MAIT cells in PBMCs and kidney MNCs.

Supplemental Figure 2. Enzymatic digestion affects CCR6-expression; all other markers tested are unaltered.

Supplemental Figure 3. Gating strategy for functional analysis of MAIT cells and CD3+CD8+ T cells in PBMCs and kidney MNCs after stimulation with PMA and Ionomycin.

Supplemental Figure 4. CD3- and MAIT cell counts.

Supplemental Figure 5. Absolute CD3 and MAIT cell numbers.

Supplemental Figure 6. Polyfunctional analysis of MAIT cells.

Supplemental Figure 7. Polyfunctional analysis of CD103- and CD103+ MAIT cells in kidney MNCs.

**Supplemental Table 1. Monoclonal antibodies used for phenotyping.**

| anti                    | clone    | fluorochrome     | staining      | manufacturer                    |
|-------------------------|----------|------------------|---------------|---------------------------------|
| CD3                     | UCHT1    | BUV496           | surface       | BD Bioscience <sup>1</sup>      |
| CD3                     | UCHT1    | V500             | surface       | BD Bioscience <sup>1</sup>      |
| CD4                     | SK3      | BUV563           | surface       | BD Bioscience <sup>1</sup>      |
| CD4                     | RPA-T4   | APC-R700         | surface       | BD Bioscience <sup>1</sup>      |
| CD4                     | RPA-T4   | BV650            | surface       | BD Bioscience <sup>1</sup>      |
| CD4                     | SK3      | PerCP-eFluor 710 | surface       | eBioscience Inc. <sup>2</sup>   |
| CD103                   | Ber-ACT8 | BUV395           | surface       | BD Bioscience <sup>1</sup>      |
| CD103                   | Ber-ACT8 | BV711            | surface       | BD Bioscience <sup>1</sup>      |
| CD161                   | DX12     | PE               | surface       | BD Bioscience <sup>1</sup>      |
| CD161                   | DX12     | FITC             | surface       | BD Bioscience <sup>1</sup>      |
| CD45                    | HI30     | PerCP-eFluor 710 | surface       | eBioscience Inc. <sup>2</sup>   |
| CD45RA                  | HI100    | BV650            | surface       | BD Bioscience <sup>1</sup>      |
| CD197 (CCR7)            | 150503   | BUV395           | surface       | BD Bioscience <sup>1</sup>      |
| CD197 (CCR7)            | 2-L1-A   | PE-CF594         | surface       | BD Bioscience <sup>1</sup>      |
| CD279 (PD1)             | EH12     | BB515            | surface       | BD Bioscience <sup>1</sup>      |
| CD127 (IL7R- $\alpha$ ) | eBioRDR5 | PE-Cy7           | surface       | eBioscience Inc. <sup>2</sup>   |
| CD4                     | SK3      | PerCP-eFluor 710 | surface       | eBioscience Inc. <sup>2</sup>   |
| CD8                     | RPA-T8   | BV785            | surface       | Sony Biotechnology <sup>3</sup> |
| CD27                    | M-T271   | APC              | surface       | BD Bioscience <sup>1</sup>      |
| CD27                    | O323     | APC-Fire750      | surface       | BioLegend <sup>4</sup>          |
| CD28                    | CD28.2   | APC              | surface       | BD Bioscience <sup>1</sup>      |
| CD28                    | CD28.2   | APC-R700         | surface       | BD Bioscience <sup>1</sup>      |
| CD186 (CXCR6)           | K041E5   | PE-Cy7           | surface       | BioLegend <sup>4</sup>          |
| CD196 (CCR6)            | G034E3   | AF488            | Surface       | BioLegend <sup>4</sup>          |
| CD69                    | FN50     | APC-Fire750      | surface       | BioLegend <sup>4</sup>          |
| CD183 (CXCR3)           | REA232   | PE-Vio615        | surface       | Miltenyi Biotec <sup>5</sup>    |
| KLRG1                   | 3F12F2   | AF488            | surface       | eBioscience Inc. <sup>2</sup>   |
| KLRG1                   | 3F12F2   | PerCP-eFluor 710 | surface       | eBioscience Inc. <sup>2</sup>   |
| Ki-67                   | Ki-67    | BV711            | intracellular | BioLegend <sup>4</sup>          |
| Ki-67                   | Ki-67    | AF700            | intracellular | BD Bioscience <sup>1</sup>      |
| granzyme B              | GB11     | AF700            | intracellular | BD Bioscience <sup>1</sup>      |
| T-bet                   | 4B10     | PE-Cy7           | intracellular | eBioscience Inc. <sup>2</sup>   |
| T-bet                   | 4B10     | BV711            | intracellular | BioLegend <sup>4</sup>          |
| Eomes                   | WD1928   | eFluor 660       | intracellular | eBioscience Inc. <sup>2</sup>   |

<sup>1</sup>Franklin Lakes, NJ, USA <sup>2</sup>Thermo Fisher Scientific, San Diego, CA, USA <sup>3</sup>Weybridge, UK

<sup>4</sup>San Diego, CA, USA <sup>5</sup>Bergisch Gladbach, Germany

**Supplemental Table 2. Monoclonal antibodies used for stimulation assay.**

| anti         | clone      | fluorochrome     | staining      | manufacturer                    |
|--------------|------------|------------------|---------------|---------------------------------|
| CD3          | SK7        | PerCP-eFluor 710 | surface       | eBioscience Inc. <sup>2</sup>   |
| CD4          | RPA-T4     | BV711            | surface       | BioLegend <sup>4</sup>          |
| CD161        | HP-3G10    | PE-Cy7           | surface       | BioLegend <sup>4</sup>          |
| CD8          | RPA-T8     | BV785            | surface       | Sony Biotechnology <sup>3</sup> |
| CD103        | Ber-ACT8   | BB515            | surface       | BD Bioscience <sup>1</sup>      |
| IFN $\gamma$ | B27        | BUV 395          | intracellular | BD Bioscience <sup>1</sup>      |
| TNF $\alpha$ | Mab11      | AF700            | intracellular | BD Bioscience <sup>1</sup>      |
| IL-17A       | N49-653    | BV650            | intracellular | BD Bioscience <sup>1</sup>      |
| IL-2         | MQ1-17H12  | BV510            | intracellular | BioLegend <sup>4</sup>          |
| GM-CSF       | BVD2-21C11 | PE-Dazzle        | intracellular | BioLegend <sup>4</sup>          |

<sup>1</sup>Franklin Lakes, NJ, USA <sup>2</sup>Thermo Fisher Scientific, San Diego, CA, USA <sup>3</sup>Weybridge, UK <sup>4</sup>San Diego, CA, USA

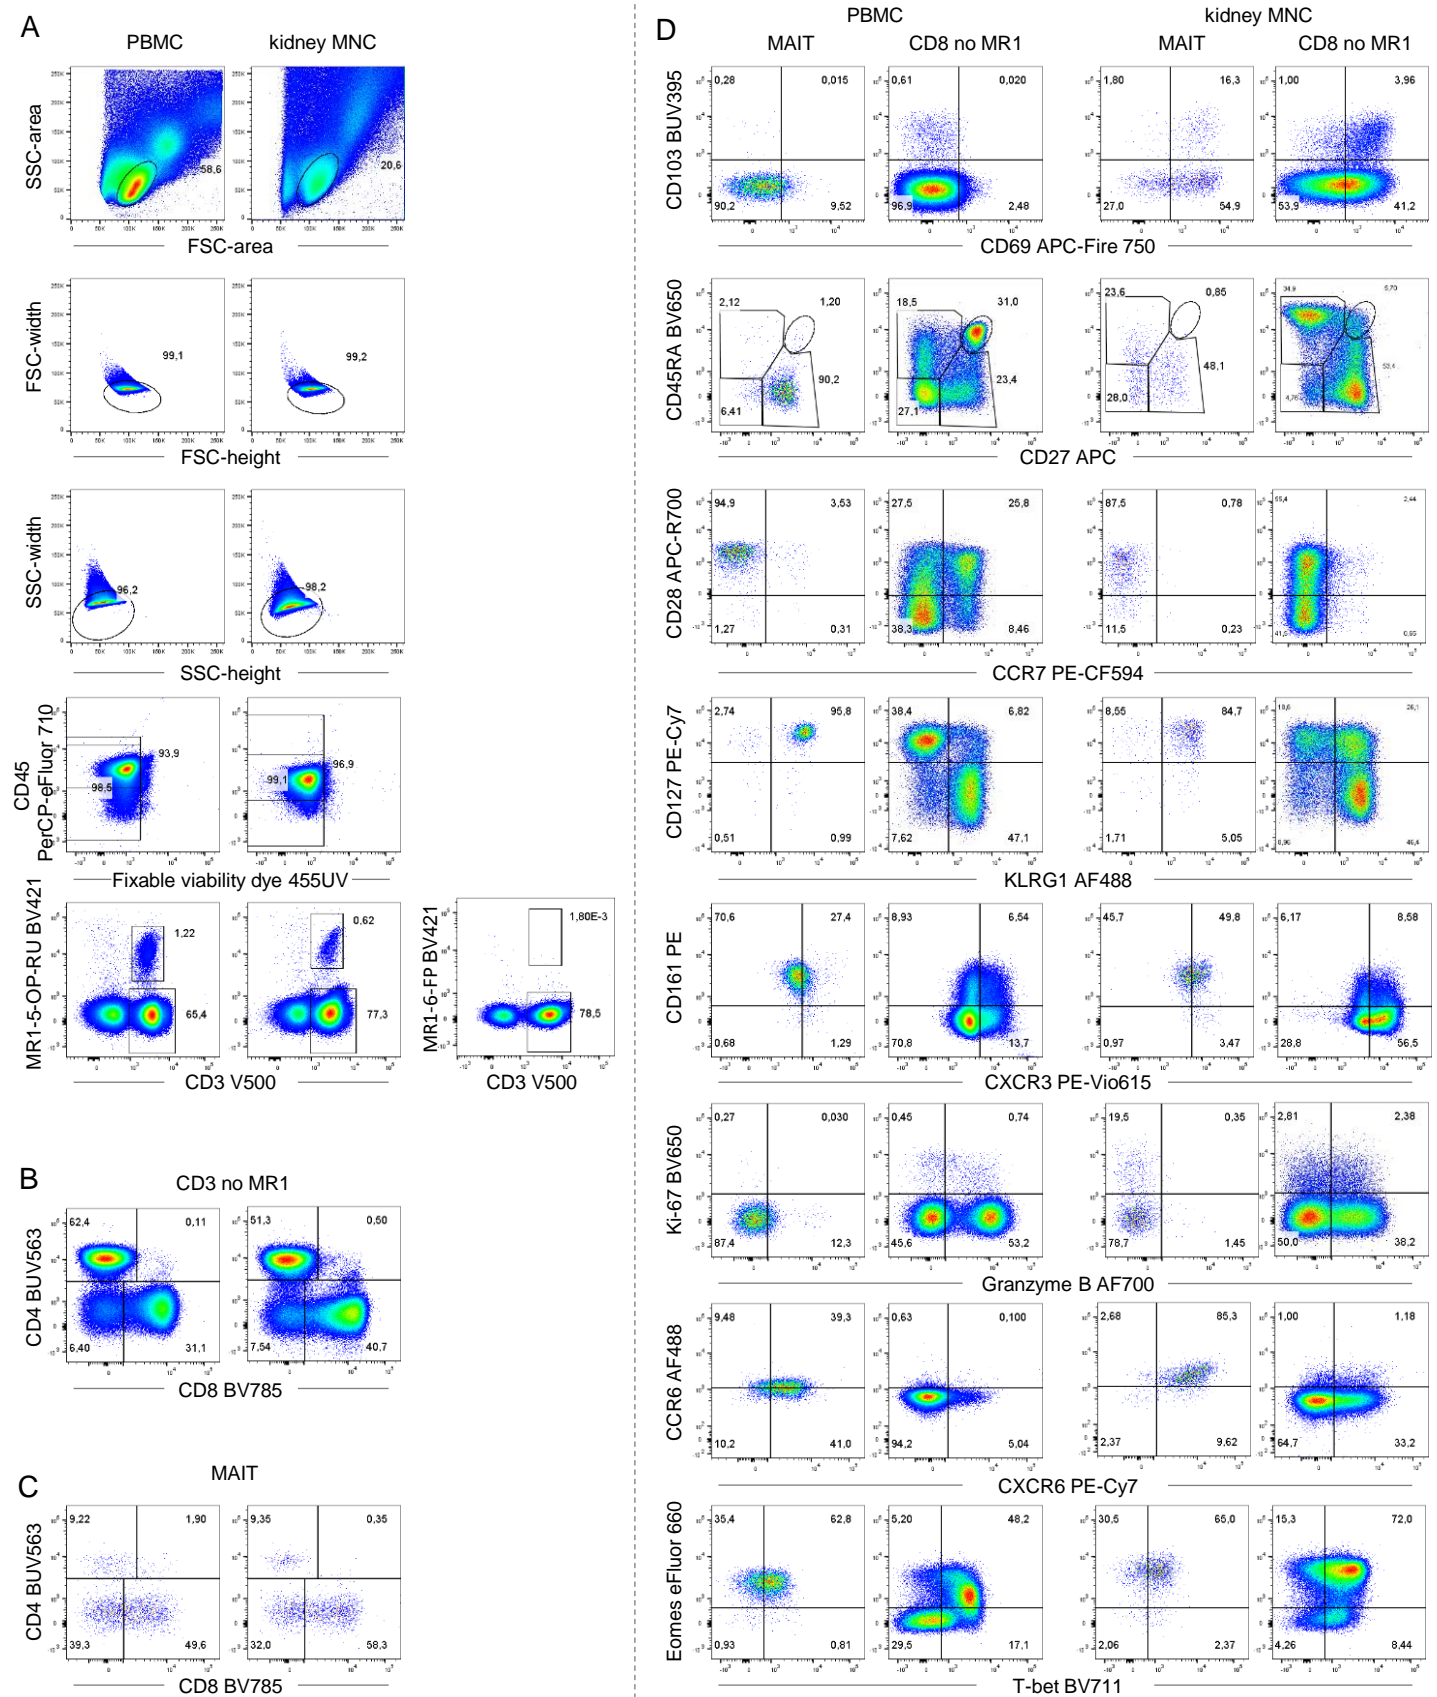

**Supplemental Figure 1. Gating strategy for phenotypical analysis of MAIT cells in PBMCs and kidney MNCs.**

(A) MAIT cells were selected by gating MR1-5-OP-RU tetramer+CD3+CD45+live single cell lymphocytes in PBMCs (left) and kidney MNCs (right). MR1-6-FP tetramer staining is shown as a control. (B-C) CD8 and CD4 gating of (B) CD3+MR1-CD45+live single cell lymphocytes (CD3 no MR1) and (C) MAIT cells in PBMCs (left) and kidney MNCs (right). (D) Examples of gating for CD69 vs CD103, CD27 vs CD45RA, CCR7 vs CD28, CXCR3 vs CD161, granzyme B vs Ki-67, CXCR6 vs CCR6 and T-bet vs Eomes, within MAIT cells and as comparison CD3+MR1-CD8+ (CD8 no MR1) T cells in PBMCs (left) and kidney MNCs (right).

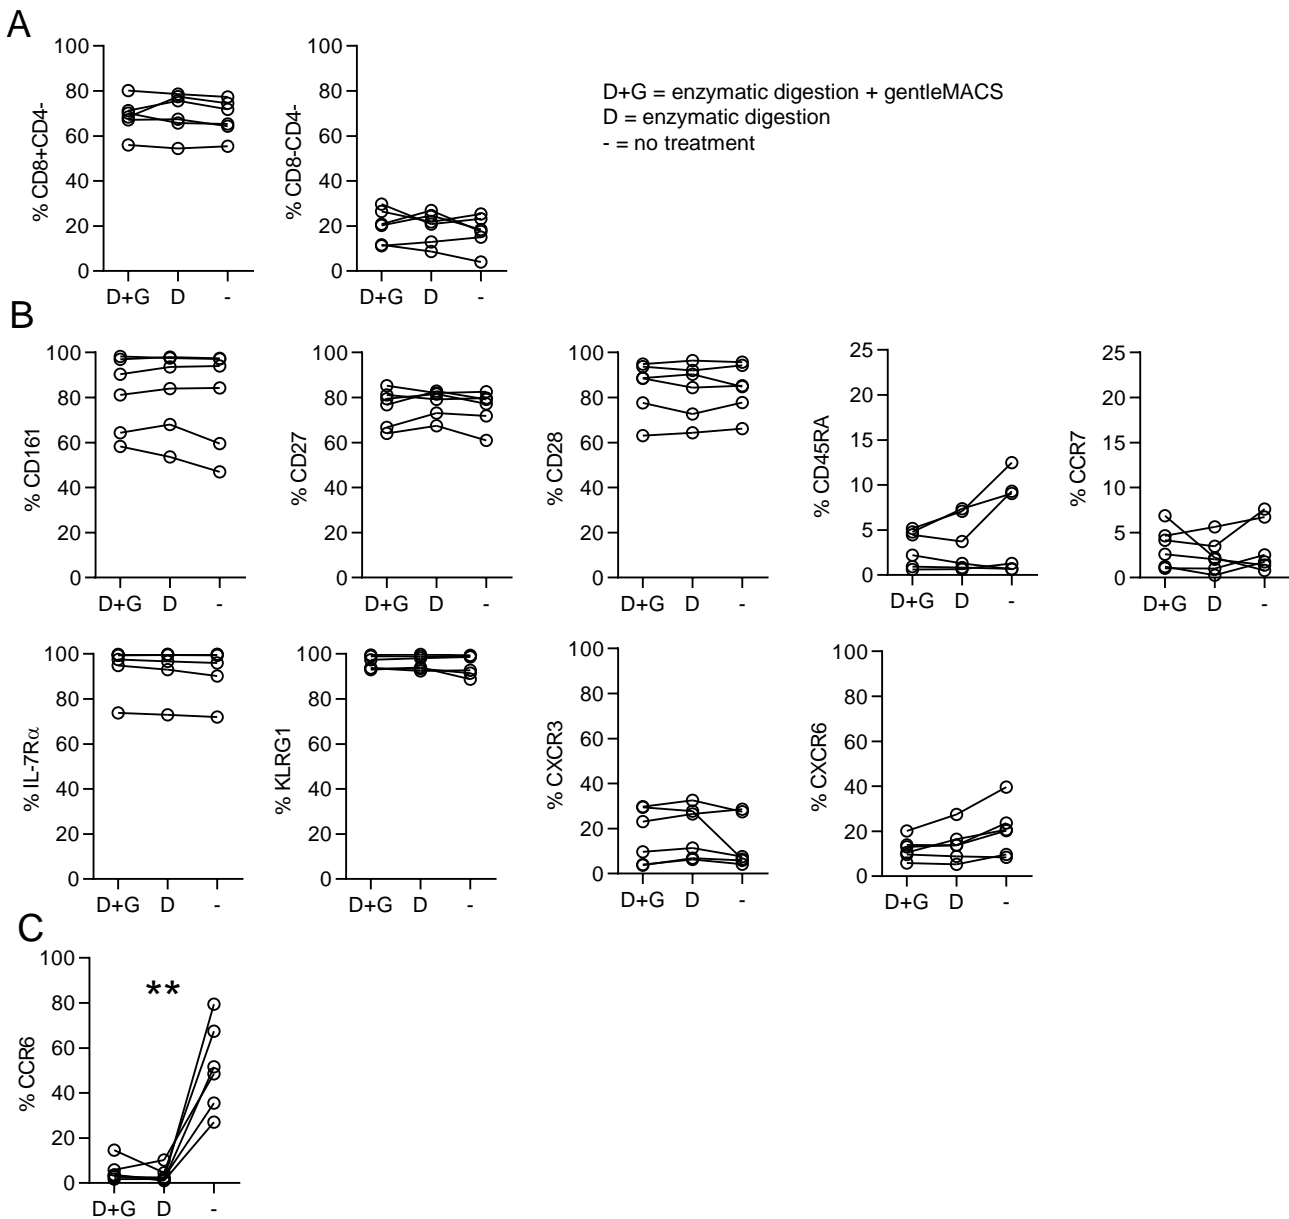

**Supplemental Figure 2. Enzymatic digestion affects CCR6-expression; all other markers tested are unaltered.**

In order to test the effect of the enzymatic digestion and gentleMACS treatment that was used to isolate kidney MNC on (surface) expression of all markers analyzed, freshly isolated PBMC were subjected to the enzymatic digestion followed by gentleMACS (D+G), enzymatic digestion alone (D) or no treatment at all (-), where after they were cryopreserved until the day of analysis. Flow cytometry was performed as described in the methods.

(A) Percentages of CD8+CD4- (CD8) and CD8-CD4- (DN) MAIT cells in the total MAIT cell population.

(B) Percentages of CD161, CD27, CD28, CD45RA, CCR7, IL-7R $\alpha$ , KLRG1, CXCR3 and CXCR6 in CD8 MAIT cells are unaffected by enzymatic digestion or enzymatic digestion followed by gentleMACS

(C) Expression of CCR6 in CD8 MAIT cells is downregulated by digestion and digestion combined with gentleMACS.

A-C Data shown are representative of 1 independent experiments with  $n = 6$  Healthy PBMCs.

The Friedman test was used to compare the three treatment protocols. Only statistical significant p-values are displayed. \*\*  $p \leq 0.01$

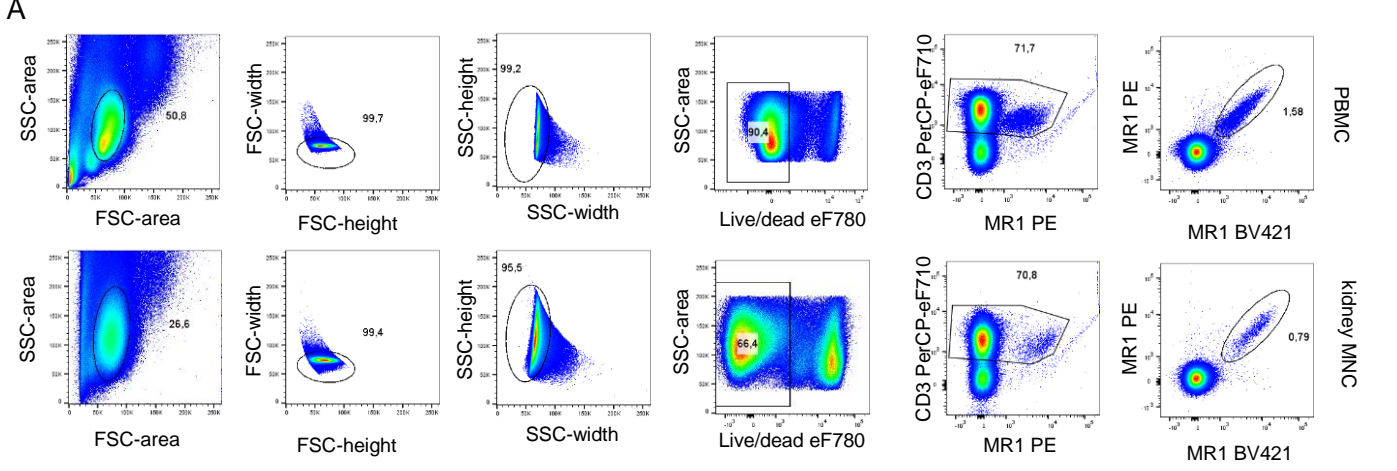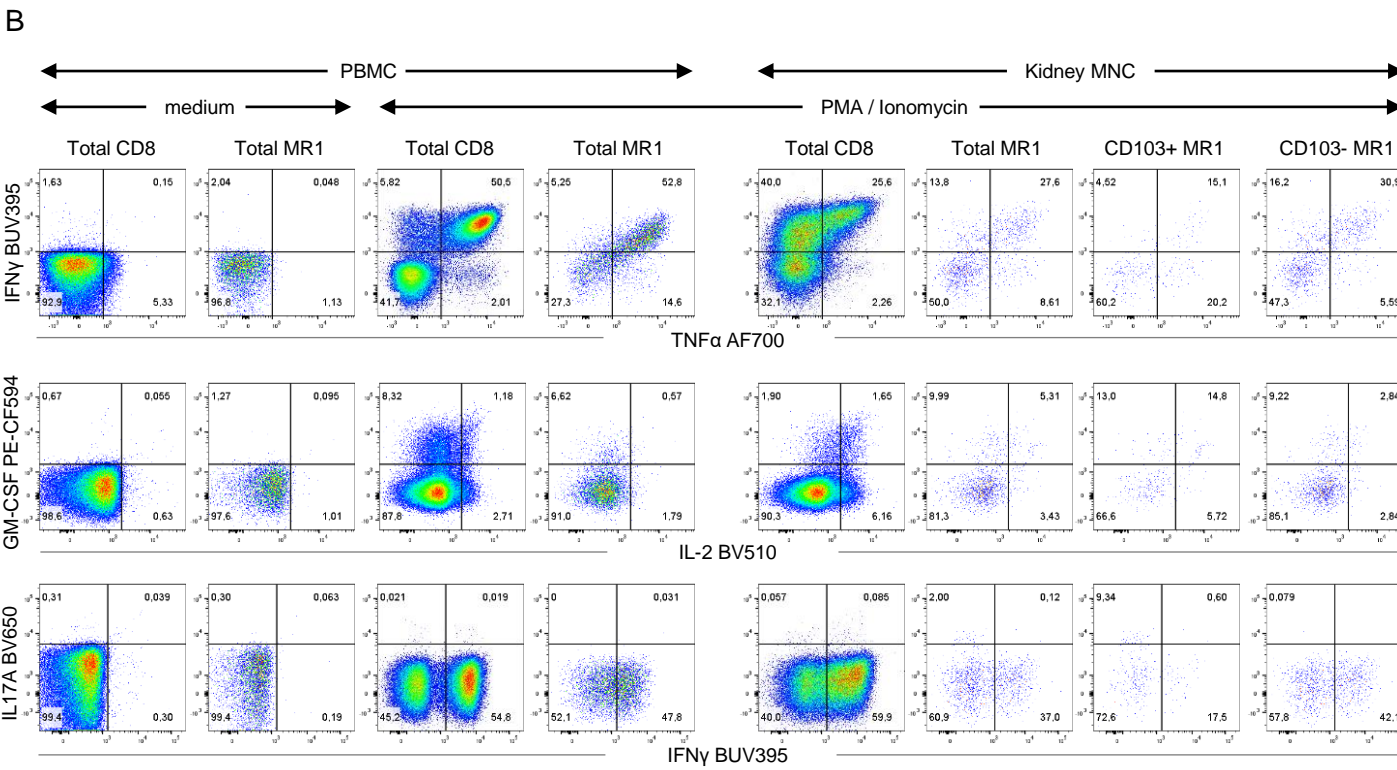

**Supplemental Figure 3. Gating strategy for functional analysis of MAIT cells and CD3+CD8+ T cells in PBMCs and kidney MNCs after stimulation with PMA and Ionomycin.**  
 (A) After stimulation with PMA and Ionomycin MAIT cells were selected by gating MR1+ cells in CD3+ live single cell lymphocytes in PBMCs (upper panel) and kidney MNCs (lower panel)  
 (B) Examples of gating of TNF $\alpha$  vs IFN $\gamma$  (upper panel), IL-2 vs GM-CSF (middle panel) and IFN $\gamma$  vs IL-17A (lower panel) within MAIT cells and total CD3+CD8+ cells from PBMCs (left panel) and kidney MNCs (right panel) after stimulation with PMA/ionomycin (right panel) and medium as a control (left panel).

A

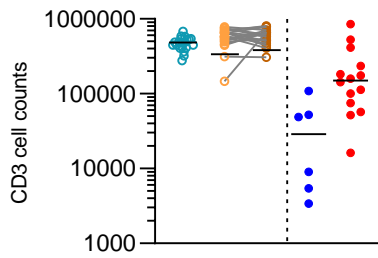

B

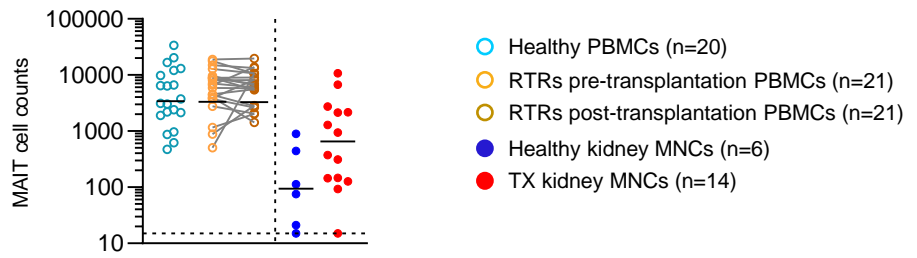

- Healthy PBMCs (n=20)
- RTRs pre-transplantation PBMCs (n=21)
- RTRs post-transplantation PBMCs (n=21)
- Healthy kidney MNCs (n=6)
- TX kidney MNCs (n=14)

#### Supplemental Figure 4. CD3- and MAIT cell counts

Scatterplots of the cell counts in our analysis of (A) CD3<sup>+</sup> cells and (B) MAIT cells analyzed per sample in healthy PBMCs, RTRs pre-transplantation PBMCs, paired post-transplantation PBMCs, healthy kidney MNCs and TX kidneys MNCs. The dotted line represents the cut-off of 15 cells for further phenotyping of MAIT cells.

No statistical comparisons were made. The horizontal dash represents the median.

Data shown represent nine experiments with  $n = 2, 4, 9, 2, 21, 10, 16, 15$  and 12 donors. 82 unique donors are shown.

PBMCs: peripheral blood mononuclear cells; RTRs: renal transplant recipients; MNCs: mononuclear cells; TX: transplant

A

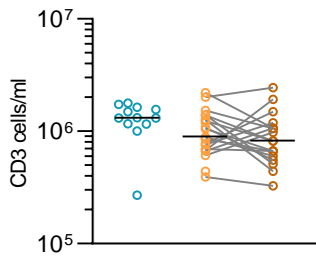

B

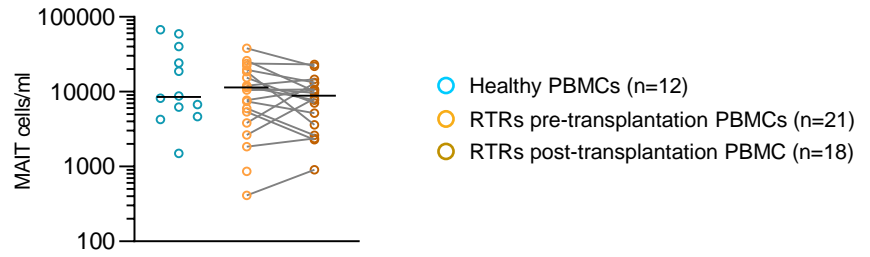

○ Healthy PBMCs (n=12)  
○ RTRs pre-transplantation PBMCs (n=21)  
○ RTRs post-transplantation PBMC (n=18)

### Supplemental Figure 5. Absolute CD3 and MAIT cell numbers

Absolute CD3- and MAIT cells in numbers in PBMCs. Absolute MAIT cell number were calculated from the absolute number of lymphocytes (determined by the clinical laboratory in the Amsterdam UMC, location AMC (LAKC)) with the following formula: [absolute number of lymphocytes]\*[percentage of MAIT cells in live lymphocytes]/100. Absolute numbers from renal tissue were unavailable.

Scatterplots of the absolute cell numbers of (A) CD3<sup>+</sup> cells and (B) MAIT cells in healthy PBMCs, RTRs pre-transplantation PBMCs, paired post-transplantation PBMCs, healthy kidney MNCs and TX kidneys MNCs. The following statistical comparisons were made: RTRs pre-transplantation vs. healthy PBMCs (Mann Whitney U-test); RTRs pre-vs. post-transplantation PBMCs (Wilcoxon signed rank test). The horizontal dash represents the median. No significant differences were found.

Data shown represent four experiments with  $n = 21, 10, 11$  and  $9$  donors. 51 unique individuals are shown. PBMCs: peripheral blood mononuclear cells; RTRs: renal transplant recipients



A

Cytokine combinations

+ + + + + + + + + + + + + - - - - - - - - - - - - - - - - - - - - TNF $\alpha$   
 + + + + + + + - - - - - - - - - + + + + + + + - - - - - - - - - IFN $\gamma$   
 + + + + - - - - + + + - - - - + + + + - - - - + + + + - - - - IL-2  
 + + - - + + - - + + - - + + - - + + - - + + - - + + - - + + - - GM-CSF  
 + - + - + - + - + - + - + - + - + - + - + - + - + - + - + - + - + - + IL-17A

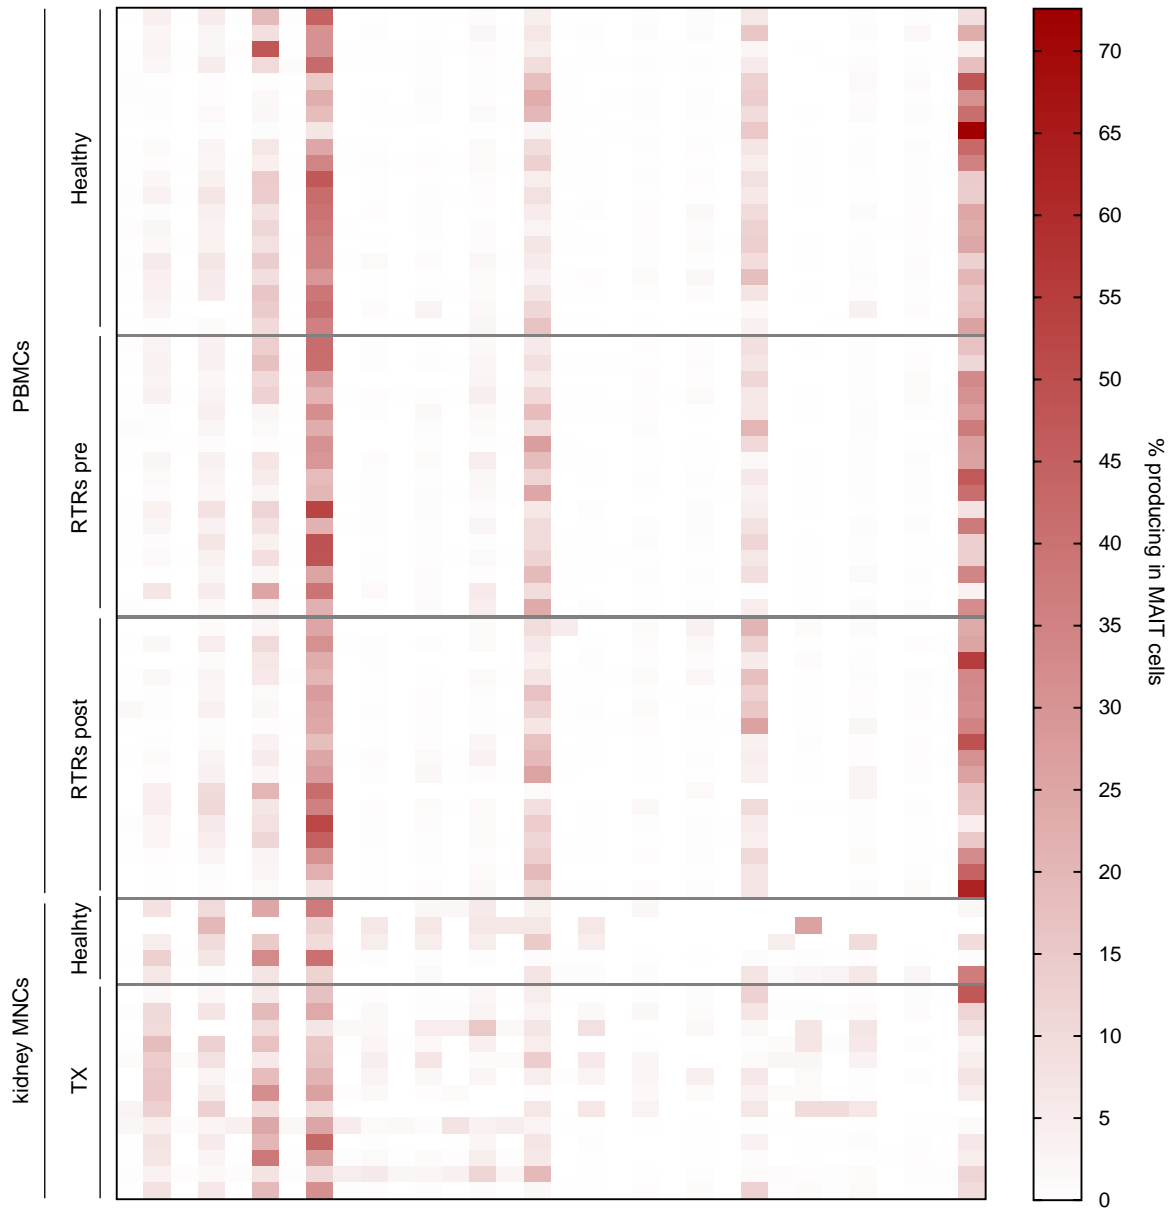

**Supplemental Figure 6. Polyfunctional analysis of MAIT cells**

(A) Heatmap of percentages of MAIT cells from healthy PBMCs, RTRs pre-transplantation PBMCs, paired post-transplantation PBMCs, healthy kidney MNCs and TX kidneys MNCs producing combinations of different cytokines after stimulation with PMA and Ionomycin.

Combinations of cytokines produced by at least 5% of MAIT cells (median values) in one of the study groups were further analyzed (figure 5B).

Data shown are representative of 8 independent experiments with  $n = 3, 8, 9, 10, 12, 12, 7$  and  $12$  individuals per experiment. 72 unique individuals are shown (Healthy PBMCs= 20; RTRs pre / post transplantation PBMCs= 17, Healthy kidney MNCs = 5 and TX kidney MNCs = 13).

PBMCs: peripheral blood mononuclear cells; RTRs; renal transplant recipients; MNCs: mononuclear cells; TX: transplant

**B**

- Healthy PBMCs (n=20)
- RTRs pre-transplantation PBMCs (n=17)
- RTRs post-transplantation PBMC (n=17)
- Healthy kidney MNCs (n=5)
- TX kidney MNCs (n=13)

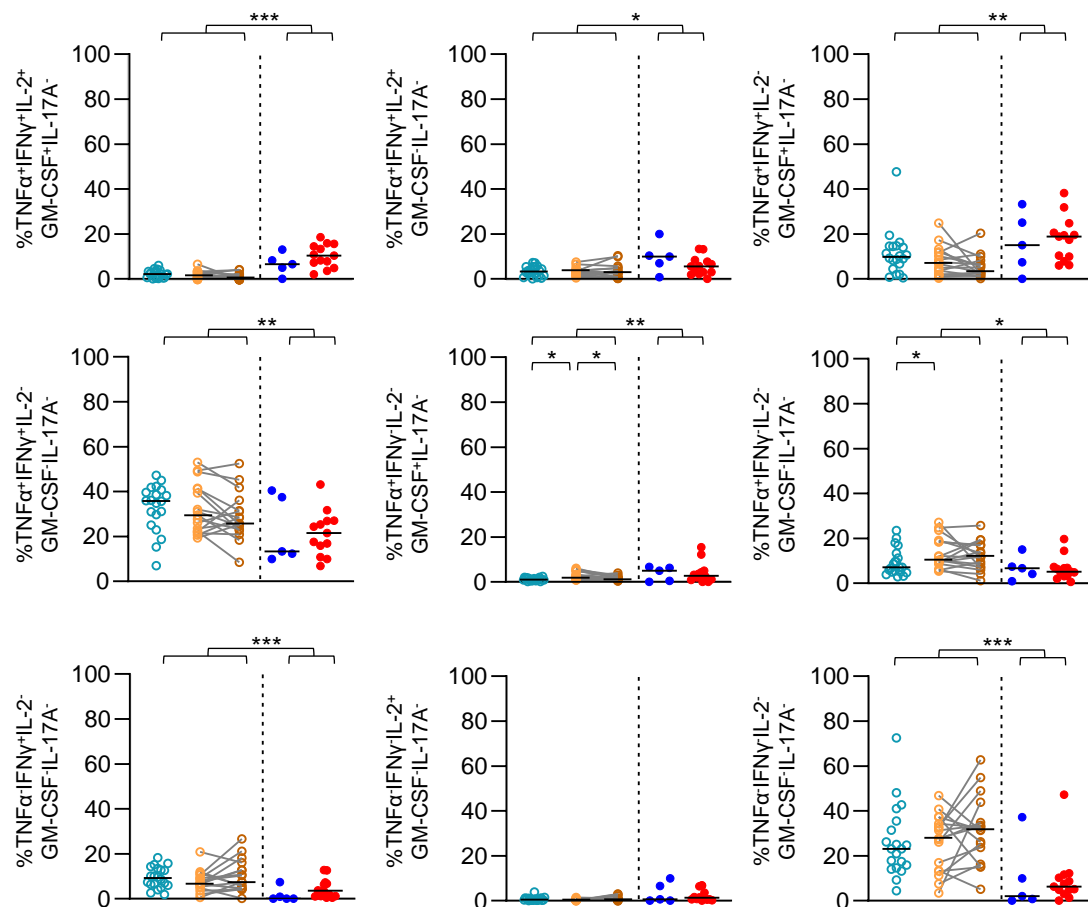

### Supplemental Figure 6 continued. Polyfunctional analysis of MAIT cells

(B) Scatterplots and statistical analysis of the most frequent combinations of cytokines produced by MAIT cells.

The following statistical comparisons were made: kidney MNCs (both healthy and TX) vs. PBMCs (healthy and RTRs post-transplantation) (Mann Whitney U-test); healthy kidney vs. TX kidney MNCs (Mann Whitney U-test); RTRs pre-transplantation vs. healthy PBMCs (Mann Whitney U-test); RTRs pre-vs. post-transplantation PBMCs (Wilcoxon signed rank test). The horizontal dash represents the median. Only significant p-values are displayed: \*  $p < 0.05$ , \*\*  $p \leq 0.01$ , \*\*\*  $p \leq 0.001$ .

Data shown are representative of 8 independent experiments with  $n = 3, 8, 9, 10, 12, 12, 7$  and 12 individuals per experiment. 72 unique individuals are shown.
